# Supplementary material for: Exploring Proton-Only NMR Experiments and Filters for Daphnia In Vivo: Potential and Limitations
Source: MDPI journal article supplement (doi:10.3390/molecules28124863), 2023-06-20
Supplement: s1 [file s1]

## Supporting information

### Table of Contents

|                           |    |
|---------------------------|----|
| S1. In vivo PSYCHE.....   | S2 |
| S2. Adiabatic TOCSY ..... | S2 |

## S1. In vivo PSYCHE

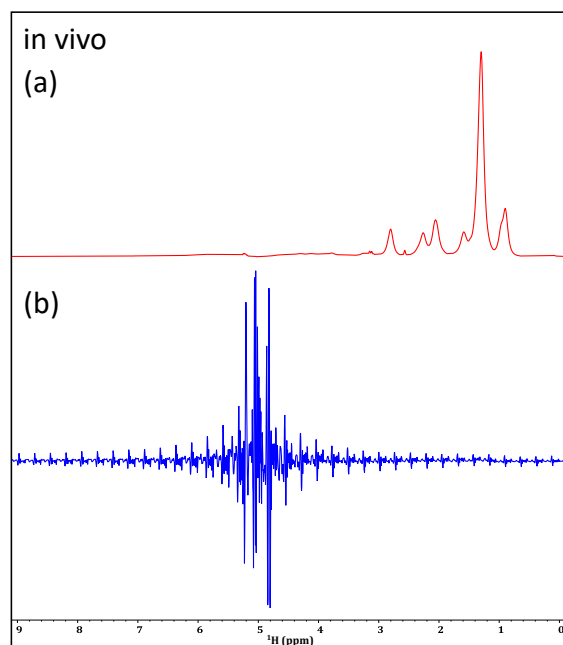

**Figure S1.** (a) Standard 1D  $^1\text{H}$  in vivo spectrum. (b) Attempt at applying  $^1\text{H}$  PSYCHE to an in vivo sample. Unfortunately, due to the excessive water signal it was not possible to extract any information in vivo using PSYCHE.

## S2. Adiabatic TOCSY

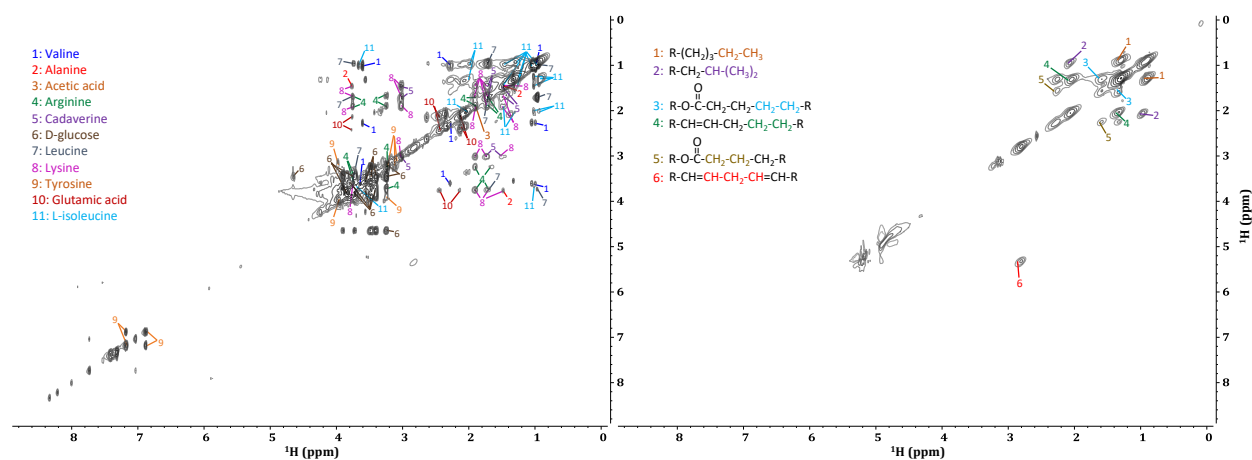

**Figure S2.** Metabolite identification from the adiabatic TOCSY of an ex vivo (**left**) and in vivo (**right**) sample of *D. magna*. Only lipids are detected in vivo and the structural units giving rise to signals are labelled.
